# Supplementary material for: Global and regional impacts of HONO on the chemical composition of clouds and aerosols
Source: Copernicus journal article supplement (doi:10.5194/acp-14-1167-2014), 2014-02-03
Supplement: Supplementary file 1 [file acp-14-1167-2014-supplement.pdf]

## Supplementary Information

# Global and Regional Impacts of HONO on the Chemical Composition of Clouds and Aerosols

---

**Y. F. Elshorbany<sup>1,\*</sup>, P. J. Crutzen<sup>1</sup>, B. Steil<sup>1</sup>, A. Pozzer<sup>1</sup>, H. Tost<sup>2</sup> and J. Lelieveld<sup>1,3</sup>**

<sup>1</sup>Max Planck Institute for Chemistry, Division of Atmospheric Chemistry, Mainz, Germany

<sup>2</sup>Institut für Physik der Atmosphäre, Johannes Gutenberg Universität, Mainz, Germany

<sup>3</sup>The Cyprus Institute, Nicosia, Cyprus

\* Correspondence to: [yasin.elshorbany@mpic.de](mailto:yasin.elshorbany@mpic.de), Tel: +49 (6131) 305 4071

Table S 1: Summary of the comparison of the base\_S1 and S1 model simulations to observations of 2001 annual mean aerosol concentrations.

OAM and MAM are the arithmetic mean of the observations and of the model, respectively, in  $\mu\text{g m}^{-3}$ , while OSTD and MSTD are the standard deviation of the observations and of the model, respectively, in  $\mu\text{g m}^{-3}$ . MAM, OAM, MSTD and OSTD represent co-located measurements and model results (i.e., based on the locations of the observations). PF2 is the percentage of modelled point within a factor of two of the observations. RMS denotes the Root Mean Square error.

| species            | network | Nr. of stations | OAM<br>[ $\mu\text{g m}^{-3}$ ] | OSTD<br>[ $\mu\text{g m}^{-3}$ ] | MAM [ $\mu\text{g m}^{-3}$ ] |      | MSTD [ $\mu\text{g m}^{-3}$ ] |      | MAM/OAM |      | PF2 [%] |    | RMS     |      |
|--------------------|---------|-----------------|---------------------------------|----------------------------------|------------------------------|------|-------------------------------|------|---------|------|---------|----|---------|------|
|                    |         |                 |                                 |                                  | base_S1                      | S1   | base_S1                       | S1   | base_S1 | S1   | base_S1 | S1 | base_S1 | S1   |
| $\text{SO}_4^{2-}$ | CASTNET | 53              | 3.31                            | 2.32                             | 3.23                         | 3.60 | 1.45                          | 1.54 | 0.97    | 1.09 | 78      | 75 | 2.29    | 2.29 |
|                    | EMEP    | 81              | 2.10                            | 1.32                             | 3.10                         | 3.28 | 1.79                          | 1.92 | 1.48    | 1.56 | 73      | 71 | 1.44    | 1.52 |
|                    | EANET   | 12              | 2.42                            | 1.84                             | 2.74                         | 2.93 | 2.12                          | 2.33 | 1.13    | 1.21 | 72      | 69 | 2.49    | 2.64 |
| $\text{NO}_3^-$    | CASTNET | 53              | 1.04                            | 1.24                             | 1.15                         | 1.16 | 0.87                          | 0.96 | 1.11    | 1.11 | 57      | 58 | 1.45    | 1.48 |
|                    | EMEP    | 26              | 1.58                            | 1.84                             | 1.57                         | 1.62 | 1.23                          | 1.33 | 0.99    | 1.03 | 68      | 68 | 1.69    | 1.7  |
|                    | EANET   | 11              | 0.63                            | 0.80                             | 0.93                         | 0.86 | 1.09                          | 1.01 | 1.48    | 1.38 | 68      | 68 | 1.48    | 1.42 |
| $\text{NH}_4^+$    | CASTNET | 53              | 1.21                            | 0.80                             | 1.11                         | 1.22 | 0.62                          | 0.67 | 0.91    | 1.01 | 81      | 78 | 0.82    | 0.83 |
|                    | EMEP    | 20              | 1.00                            | 0.93                             | 1.19                         | 1.27 | 1.03                          | 1.09 | 1.19    | 1.27 | 71      | 69 | 0.91    | 0.94 |
|                    | EANET   | 12              | 0.81                            | 0.74                             | 0.77                         | 0.81 | 0.83                          | 0.90 | 0.94    | 1.00 | 78      | 76 | 0.92    | 0.98 |

Table S 2: Summary of the comparison of the base\_S1 and S1 model simulations to observations of aerosol concentrations during January 2001.

OAM and MAM are the arithmetic mean of the observations and of the model, respectively, in  $\mu\text{g m}^{-3}$ , while OSTD and MSTD are the standard deviation of the observations and of the model, respectively, in  $\mu\text{g m}^{-3}$ . MAM, OAM, MSTD and OSTD represent co-located measurements and model results (i.e., based on the locations of the observations). PF2 is the percentage of modeled point within a factor of two of the observations. RMS denotes the Root Mean Square error.

| species            | network | Nr. of stations | OAM [ $\mu\text{g m}^{-3}$ ] | OSTD [ $\mu\text{g m}^{-3}$ ] | MAM [ $\mu\text{g m}^{-3}$ ] |      | MSTD [ $\mu\text{g m}^{-3}$ ] |      | MAM/OAM |      | PF2 [%] |    | RMS     |      |
|--------------------|---------|-----------------|------------------------------|-------------------------------|------------------------------|------|-------------------------------|------|---------|------|---------|----|---------|------|
|                    |         |                 |                              |                               | base_S1                      | S1   | base_S1                       | S1   | base_S1 | S1   | base_S1 | S1 | base_S1 | S1   |
| $\text{SO}_4^{2-}$ | CASTNET | 54              | 3.11                         | 1.96                          | 2.55                         | 3.12 | 0.80                          | 0.97 | 0.82    | 1.00 | 89      | 85 | 1.8     | 1.65 |
|                    | EMEP    | 81              | 2.04                         | 1.46                          | 3.19                         | 3.38 | 1.41                          | 1.58 | 1.56    | 1.65 | 64      | 64 | 1.38    | 1.4  |
|                    | EANET   | 12              | 2.53                         | 1.44                          | 2.55                         | 2.72 | 1.46                          | 1.61 | 1.01    | 1.07 | 75      | 67 | 1.95    | 2.07 |
| $\text{NO}_3^-$    | CASTNET | 54              | 1.36                         | 1.54                          | 1.90                         | 2.19 | 1.15                          | 1.52 | 1.40    | 1.62 | 44      | 46 | 1.67    | 1.9  |
|                    | EMEP    | 28              | 1.84                         | 2.17                          | 2.19                         | 2.39 | 0.73                          | 0.86 | 1.19    | 1.30 | 44      | 41 | 2.1     | 2.03 |
|                    | EANET   | 10              | 0.66                         | 0.62                          | 1.20                         | 1.12 | 0.92                          | 0.86 | 1.82    | 1.70 | 60      | 60 | 1.44    | 1.36 |
| $\text{NH}_4^+$    | CASTNET | 54              | 1.28                         | 0.80                          | 1.25                         | 1.52 | 0.65                          | 0.76 | 0.97    | 1.19 | 85      | 80 | 0.66    | 0.67 |
|                    | EMEP    | 22              | 1.10                         | 1.10                          | 1.49                         | 1.61 | 0.90                          | 0.98 | 1.36    | 1.46 | 50      | 50 | 0.96    | 0.99 |
|                    | EANET   | 10              | 0.78                         | 0.51                          | 0.79                         | 0.84 | 0.67                          | 0.73 | 1.02    | 1.08 | 60      | 60 | 0.65    | 0.7  |

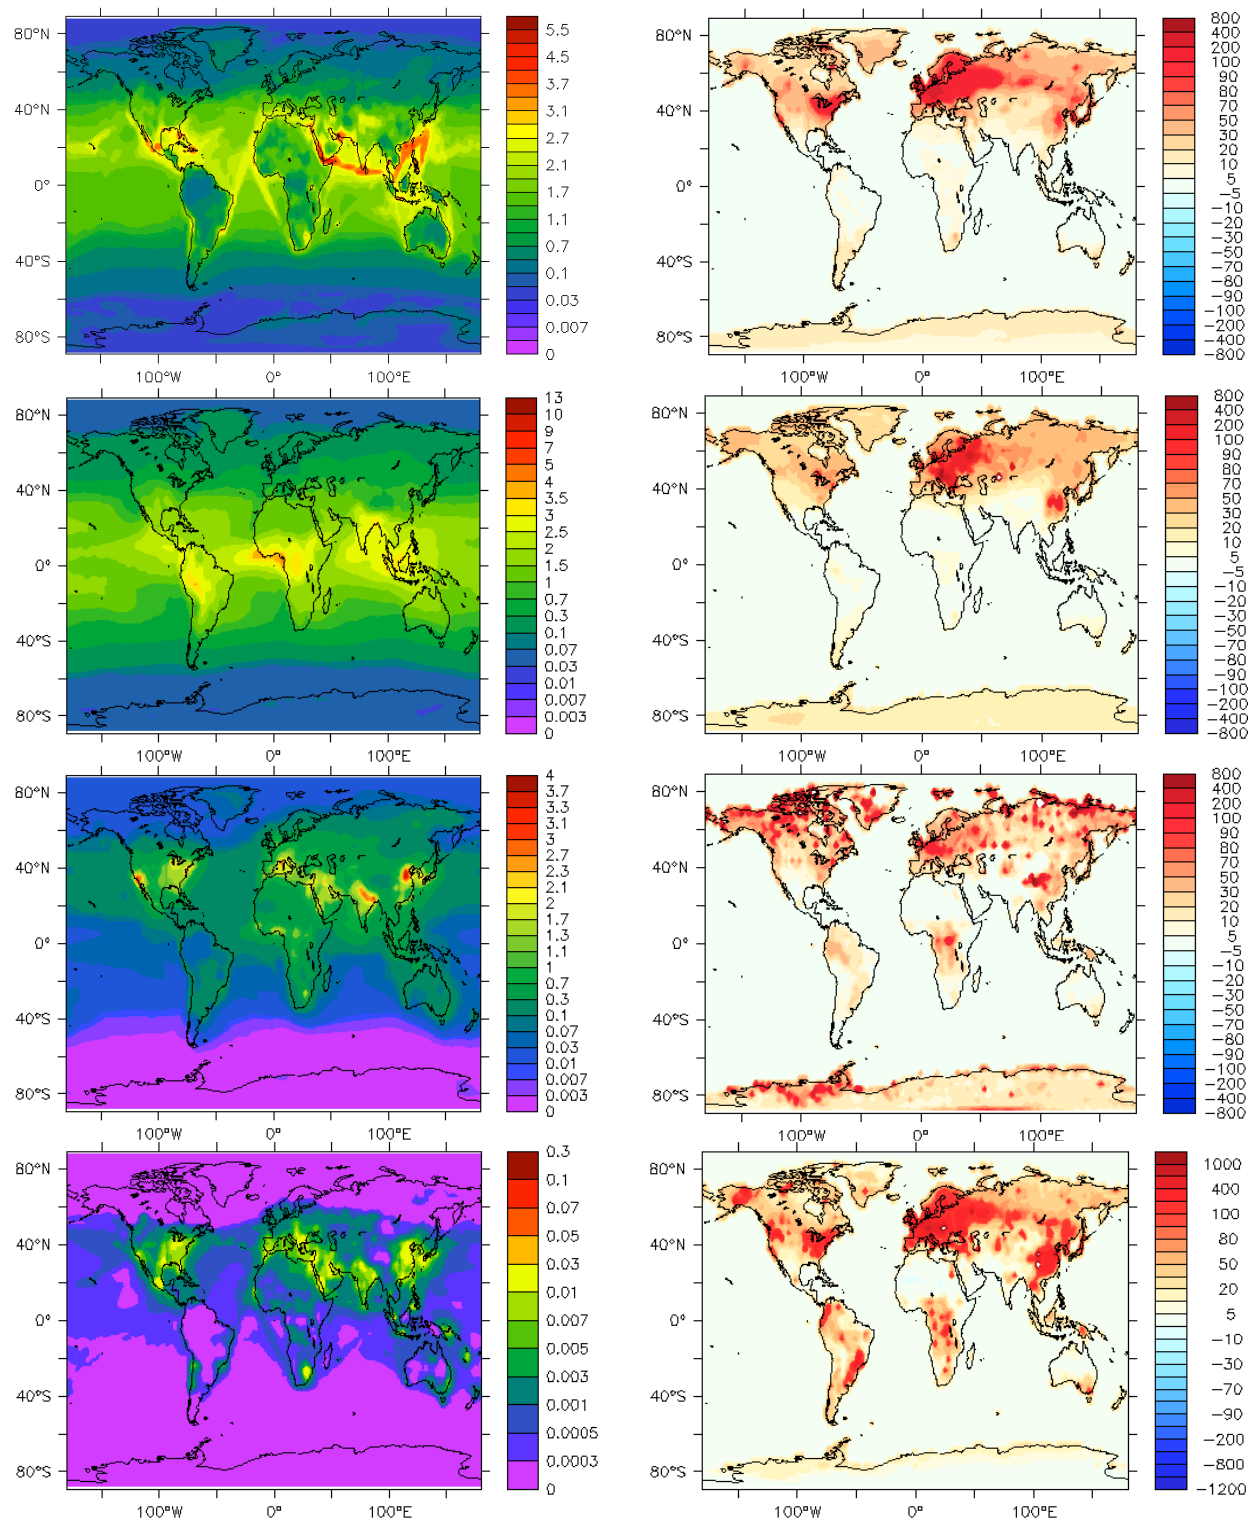

Figure S 1: Average annual simulated OH (from top to bottom) ( $10^6 \text{ molecules cm}^{-3}$ ),  $\text{H}_2\text{O}_2$ ,  $\text{HNO}_3$ ,  $\text{H}_2\text{SO}_4$  (ppbv) near the surface from the reference run (left panels) and their relative enhancements (%) by using a HONO/ $\text{NO}_x$  ratio of 0.02 (right panels) in 2001.

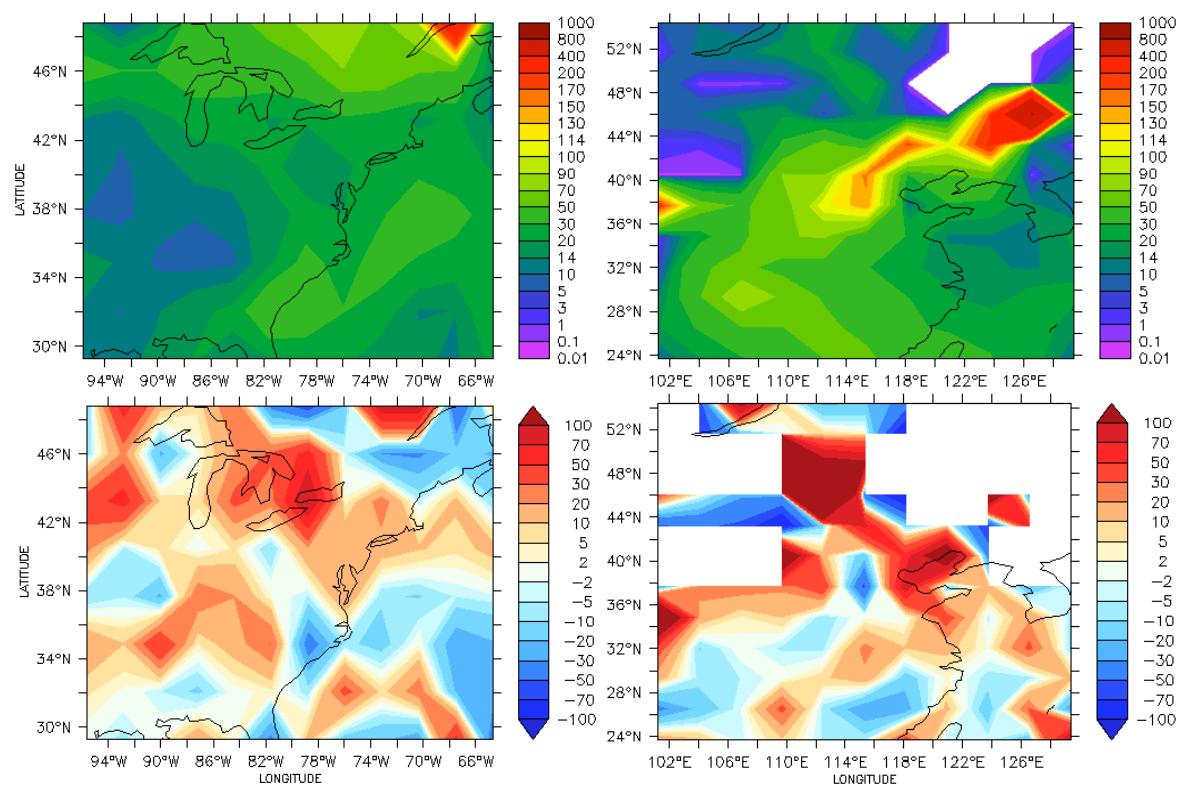

Figure S 2: Monthly mean aqueous phase concentration of  $\text{NO}_3^-$  ( $10^{-6}$  M, upper panel, base\_S1) during winter (January) and the relative enhancements (lower panel) due to HONO enhancements (S1) in the model over the eastern US (left) and China (right).

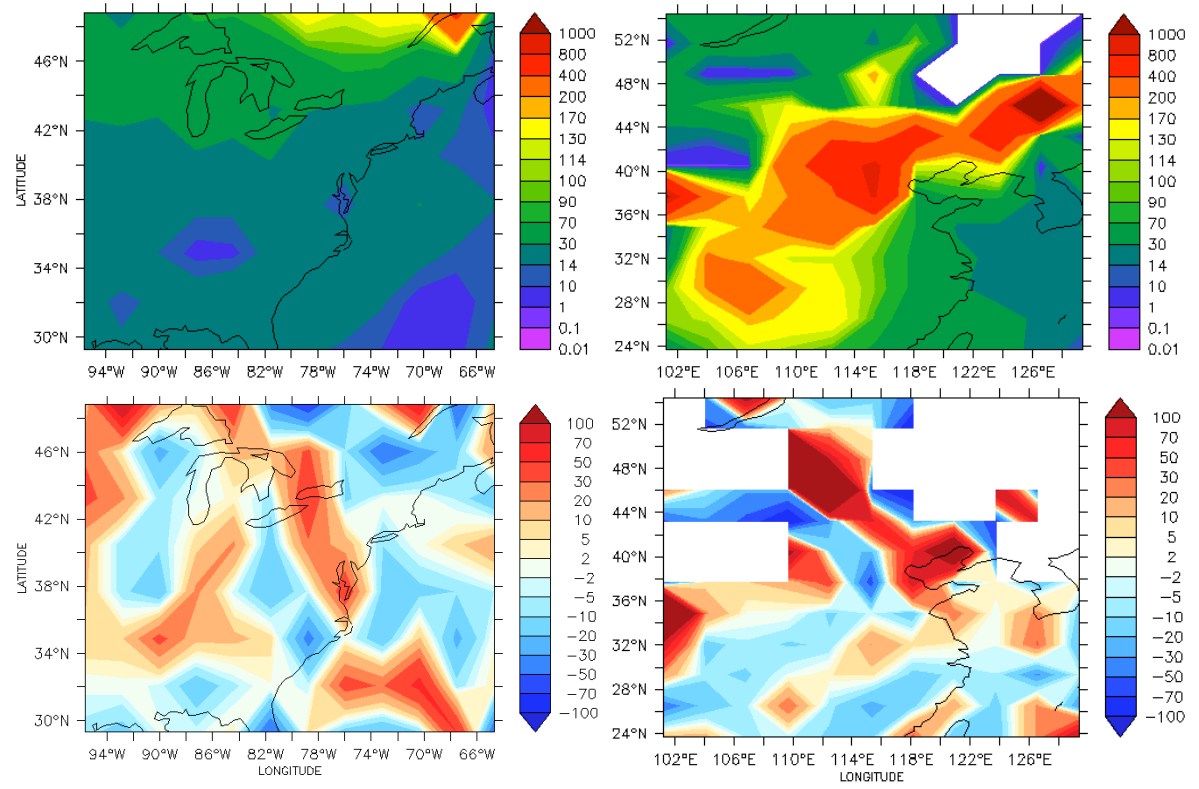

Figure S 3: Monthly mean aqueous phase concentration of  $\text{NH}_4^+$  ( $10^{-6}$  M, upper panel, base\_S1) during winter (January) and the relative enhancements (lower panel) due to HONO enhancements (S1) in the model over the eastern US (left) and China (right).

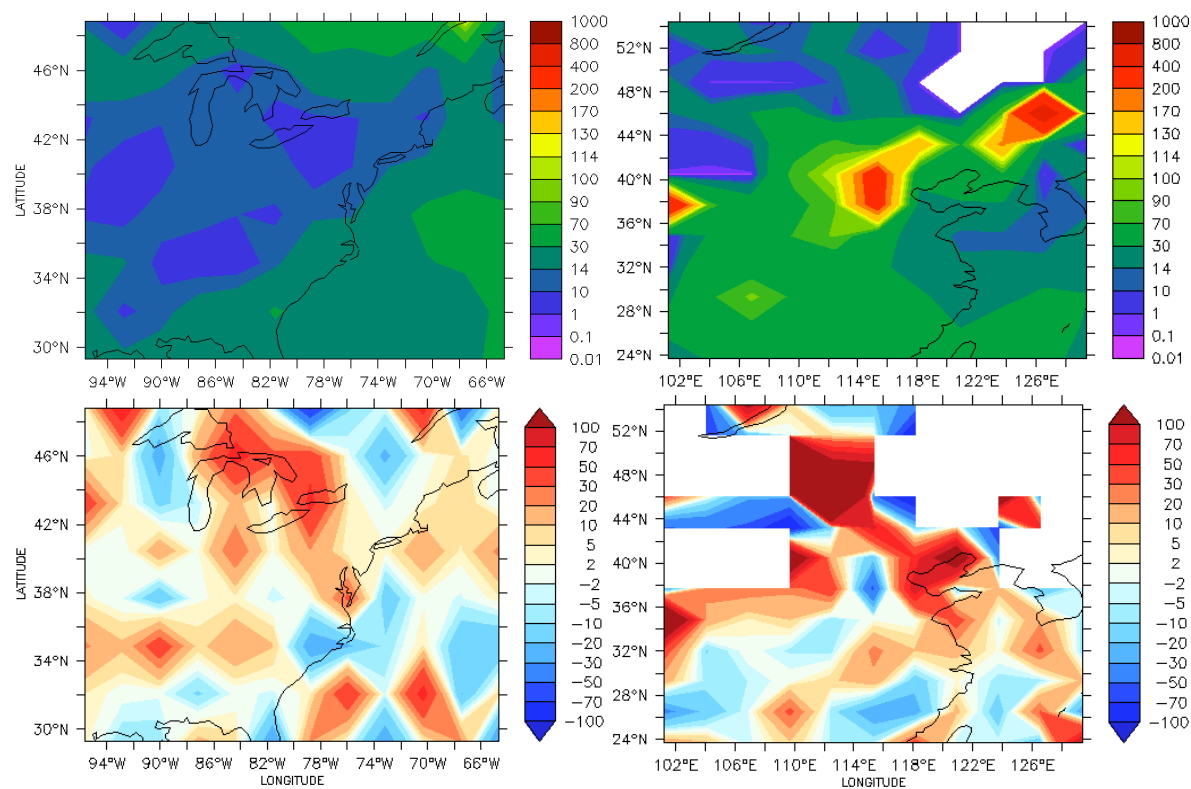

Figure S 4: Monthly mean aqueous phase concentration of  $\text{SO}_4^{2-}$  ( $10^{-6}$  M, upper panel, base\_S1) during winter (January) and the relative enhancements (lower panel) due to HONO enhancements (S1) in the model over the eastern US (left) and China (right).

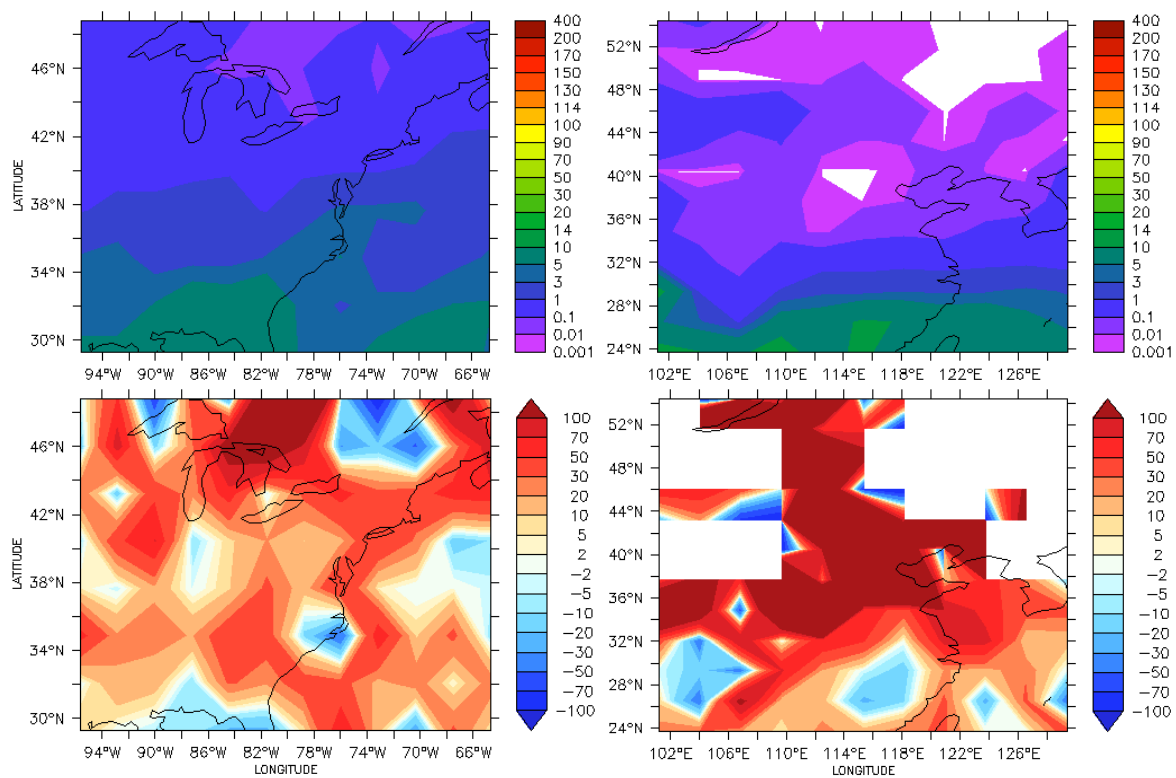

Figure S 5: Monthly mean aqueous phase concentration of  $\text{H}_2\text{O}_2$  ( $10^{-6}$  M, upper panel, base\_S1) during winter (January) and the relative enhancements (lower panel) due to HONO enhancements (S1) in the model over the eastern US (left) and China (right).

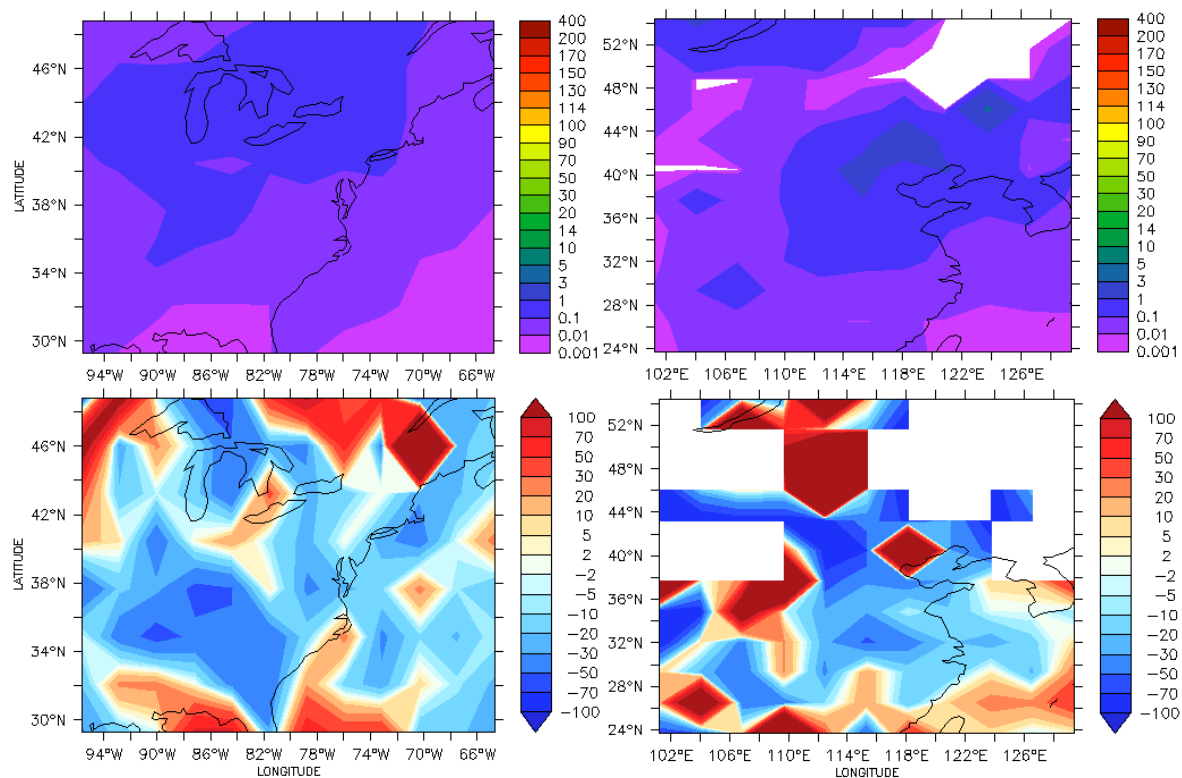

Figure S 6: Monthly mean aqueous phase concentration of  $\text{HSO}_3^-$  ( $10^{-6}$  M, upper panel, base\_S1) during winter (January) and the relative enhancements (lower panel) due to HONO enhancements (S1) in the model over the eastern US (left) and China (right).

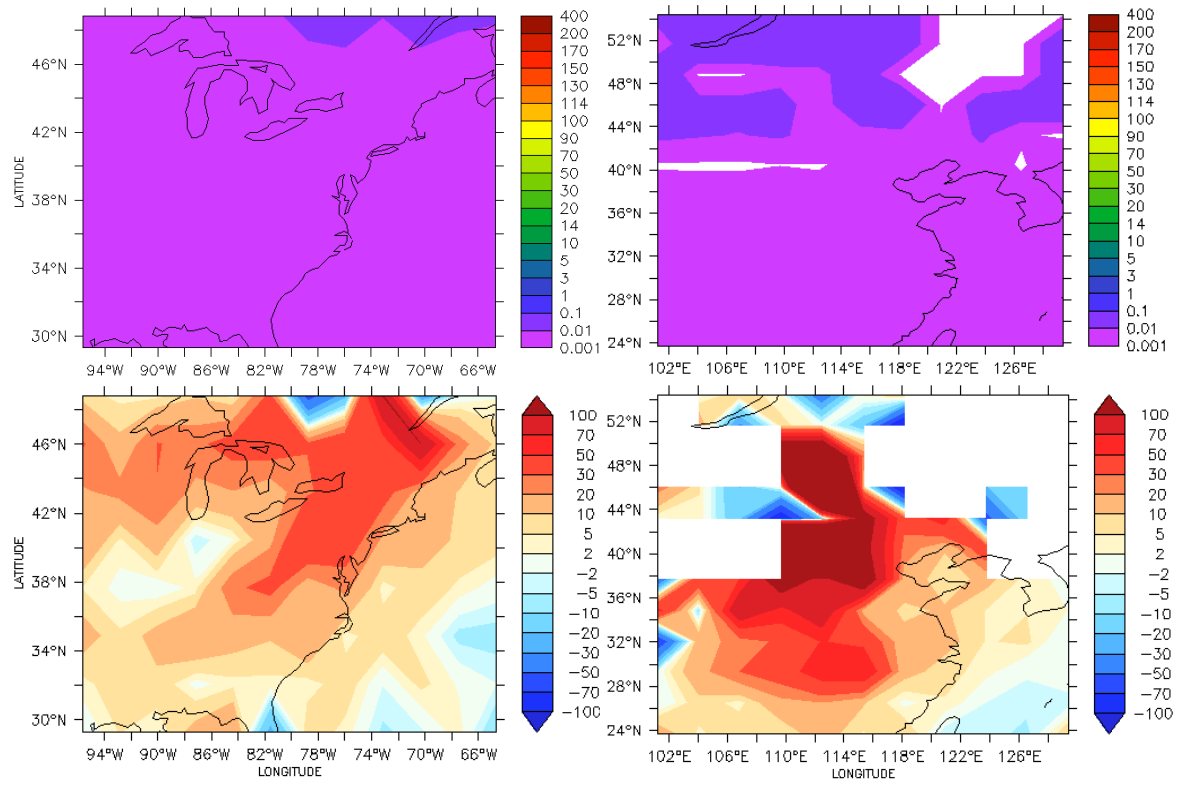

Figure S 7: Monthly mean aqueous phase concentration of  $O_3$  ( $10^{-9}$  M, upper panel, base\_S1) during winter (January) and the relative enhancements (lower panel) due to HONO enhancements (S1) in the model over the eastern US (left) and China (right).
